# Supplementary material for: Effect of non-covalent interaction on the diastereoselective self-assembly of Cu(ii) complexes containing a racemic Schiff base in a chiral self-discriminating process
Source: Royal Society of Chemistry journal article supplement (doi:10.1039/c3nj01547e), 2014-01-01
Supplement: c3nj01547e1.pdf [file c3nj01547e1.pdf]

## Supporting Information

### Effect of non-covalent interaction on the diastereoselective self-assembly of Cu(II) complexes containing a racemic Schiff base in a chiral self-discriminating process

Himanshu Sekhar Jena\*†,

\*Department of Chemistry, Indian Institute of Technology, Guwahati, Guwahati, Assam, India 781039.  
 Email: [hsjena@iiserb.ac.in](mailto:hsjena@iiserb.ac.in), Tel.: +91 9425807692, Fax: +91 755 4092392

#### Present Addresses

†Post-Doctoral Fellow, Department of Chemistry, Indian Institute of Science Education and Research Bhopal, Indore-Bhopal by pass Road, Madhya Pradesh, India 462066. Email: [hsjena@iiserb.ac.in](mailto:hsjena@iiserb.ac.in), Tel: +91 9425807692, Fax: +91 755 4092392.

**Table S1.** Selected bond distances (Å) and bond angles (°) found in compounds **1-5**.

|                       | <b>1</b>  | <b>2</b> | <b>3</b> | <b>4</b>  | <b>5</b>  |
|-----------------------|-----------|----------|----------|-----------|-----------|
| Cu(1) - N(1)          | 1.976(1)  | 1.972(4) | 2.005(4) | 2.009(2)  | 2.022(1)  |
| Cu(1) - N(2)          | 1.936(1)  | 1.935(4) | 1.952(3) | 1.939(2)  | 1.943(1)  |
| Cu(1) - N(3)          | -         | -        | 1.992(3) | 1.944(2)  | 1.937(1)  |
| Cu(1) - N(3A)         | -         | -        | 2.591(3) | -         | -         |
| Cu(1) - O(1)          | 1.901(1)  | 1.896(3) | 1.891(3) | 1.926(2)  | 1.927(1)  |
| Cu(1) - O(1A)         | 2.480(1)  | -        | -        | 2.413(1)  | 2.693(1)  |
| Cu(1) - O(2)          | 1.994(1)  | 1.998(3) | -        | -         | -         |
| Cu(1) - O(3)          | -         | 2.463(8) | -        | -         | -         |
| Cu(1) - Cu(1A)        | 3.172(1)  | -        | 3.434(1) | 3.150(1)  | 3.343(1)  |
| N(1) - Cu(1) - N(2)   | 82.66(5)  | 82.9(2)  | 82.1(1)  | 82.01(7)  | 81.32(5)  |
| N(1) - Cu(1) - N(3)   | -         | -        | 88.4(1)  | 94.02(8)  | 93.78(6)  |
| N(1) - Cu(1) - N(3A)  | -         | -        | 94.1(1)  | -         | -         |
| N(1) - Cu(1) - O(1)   | 175.18(5) | 173.2(2) | 173.3(1) | 174.19(7) | 173.73(5) |
| N(1) - Cu(1) - O(1A)  | 89.60(5)  | -        | -        | 93.62(6)  | 92.04(4)  |
| N(1) - Cu(1) - O(2)   | 95.07(5)  | 93.6(2)  | -        | -         | -         |
| N(1) - Cu(1) - O(3)   | -         | 86.1(2)  | -        | -         | -         |
| N(2) - Cu(1) - O(1)   | 93.24(5)  | 94.2(2)  | 92.7(1)  | 92.19(6)  | 92.44(5)  |
| N(2) - Cu(1) - O(1A)  | 94.48(5)  | -        | -        | 98.52(6)  | 92.87(4)  |
| N(2) - Cu(1) - O(2)   | 172.58(5) | 173.8(1) | -        | -         | -         |
| N(2) - Cu(1) - O(3)   | -         | 103.5(2) | -        | -         | -         |
| N(2) - Cu(1) - N(3)   | -         | -        | 106.0(1) | 167.30(8) | 170.96(6) |
| N(2) - Cu(1) - N(3A)  | -         | -        | 169.4(1) | -         | -         |
| N(3) - Cu(1) - N(3A)  | -         | -        | 83.6(1)  | -         | -         |
| O(1) - Cu(1) - N(3)   | -         | -        | 97.1(1)  | 91.58(7)  | 92.33(6)  |
| O(1) - Cu(1) - N(3A)  | -         | -        | 90.4(1)  | -         | -         |
| O(1) - Cu(1) - O(2)   | 89.32(5)  | 88.7(1)  | -        | -         | -         |
| O(1) - Cu(1) - O(3)   | -         | 100.6(2) | -        | -         | -         |
| O(1) - Cu(1) - O(1A)  | 88.20(4)  | -        | -        | 87.57(5)  | -         |
| O(2) - Cu(1) - O(1A)  | 92.56(4)  | -        | -        | -         | -         |
| O(2) - Cu(1) - O(3)   | -         | 81.3(2)  | -        | -         | -         |
| O(1) - Cu(1) - O(1A)  | 88.20(4)  | -        | -        | 87.57(5)  | 88.83(4)  |
| Cu(1) - O(1) - Cu(1A) | 91.80(4)  | -        | -        | 92.43(5)  | 91.17(4)  |
| N(3) - Cu(1) - N(3A)  | -         | -        | 83.6(1)  | -         | -         |
| N(3) - Cu(1) - O(1)   | -         | -        | 93.75(7) | -         | 94.91(5)  |
| Cu(1) - N(3) - Cu(1A) | -         | -        | 83.6(1)  | -         | -         |
